# Supplementary material
Source: Springer Nature journal article supplement (https://www.springermedizin.de/resource/supplementary/12885_2010_2744_MOESM3_ESM.pdf/9461858)

Chemotherapy Other Medication Outpatient Inpatient

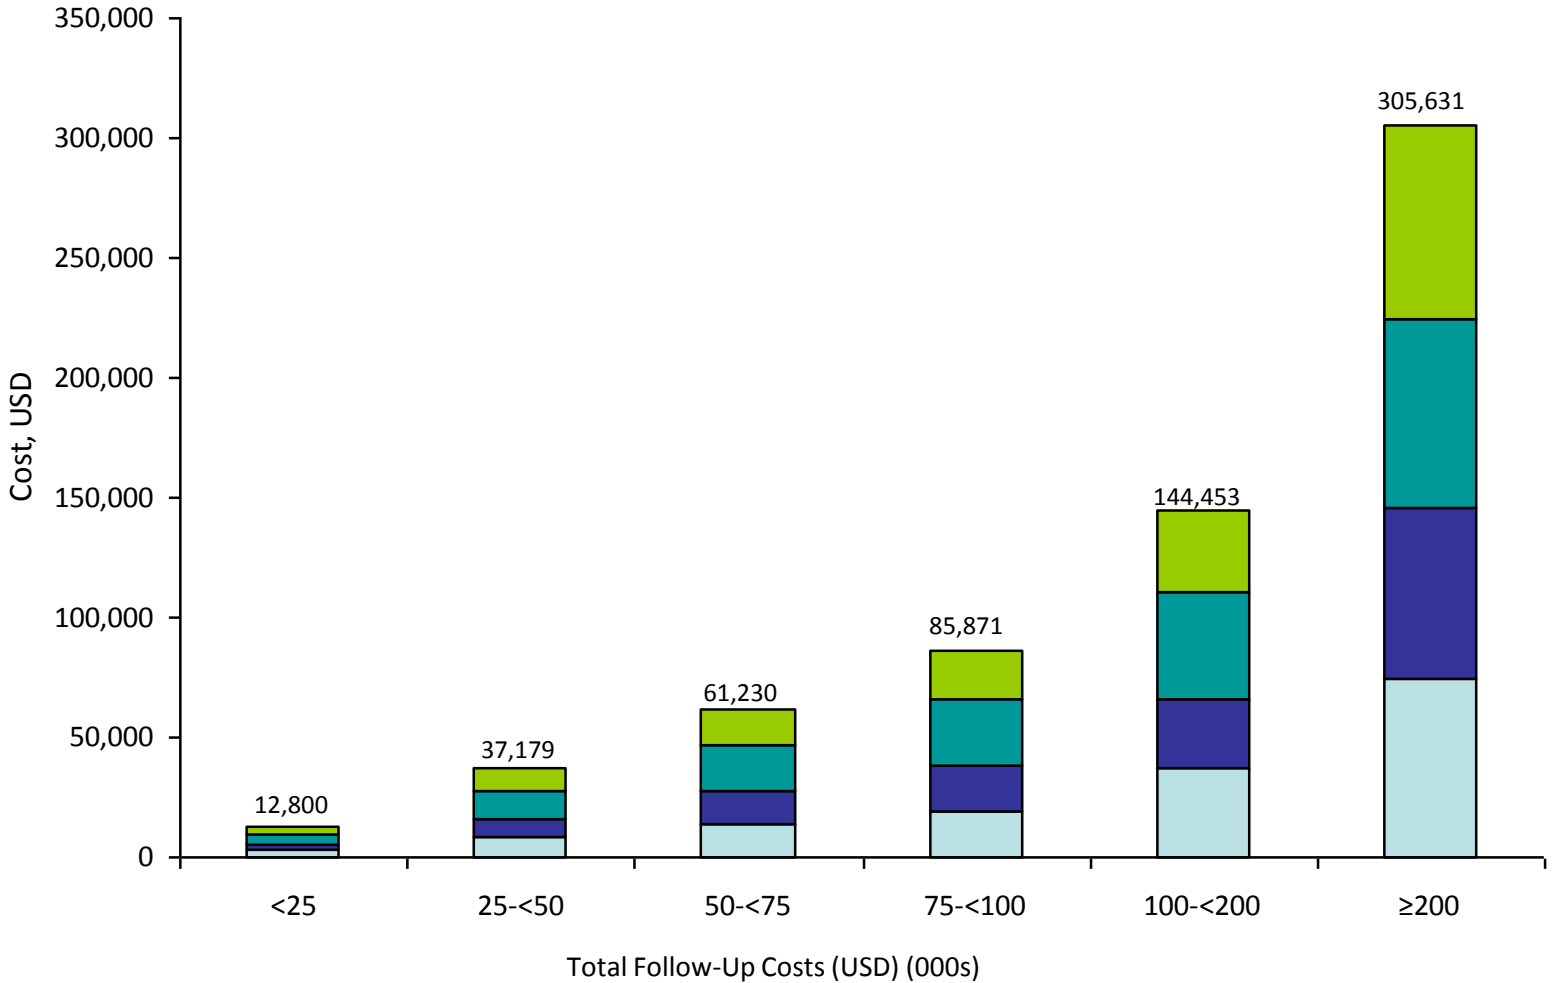

Patients 203 190 131 108 204 121

Supplement: MOESM3 [file 9461858]
